# Supplementary material for: Synthetic analysis of trophic diversity and evolution in Enantiornithes with new insights from Bohaiornithidae
Source: eLife. 2024 Apr 30;12:RP89871. doi: 10.7554/eLife.89871 (PMC11060716; doi:10.7554/eLife.89871)
Supplement: Supplementary file 1. [file elife-89871-supp1.xlsx]

## Sheet: Kmult
Dataset	Kmult	p-value
Mass	0.932	0.001***
MA	0.628	0.001***
FEA	0.252	0.503
pedal TM	0.477	0.001***
skull TM	0.898	0.001***
K (mass) and Kmult (all others) values for each extant dataset investigated. Kmult values are calculated from the same datasets as Miller et al. 2023 [Quantitative investigation of Mesozoic toothed birds (Pengornithidae) diet reveals earliest evidence of macrocarnivory in birds], with an updated phylogeny. These Kmult values are similar to those reported in Miller et al. 2023, if slightly lower. …
