# Supplementary material for: Synthetic analysis of trophic diversity and evolution in Enantiornithes with new insights from Bohaiornithidae
Source: eLife. 2024 Apr 30;12:RP89871. doi: 10.7554/eLife.89871 (PMC11060716; doi:10.7554/eLife.89871)
Supplement: Supplementary file 2. [file elife-89871-supp2.xlsx]

## Sheet: MA K
Jaw	Variable	K	p-value
Upper	AMA	0.563508	0.001***
	PMA	0.44203	0.001***
	OMA	0.353194	0.001***
	AO	0.777356	0.001***
	MCH	0.780507	0.001***
	ACH	1.14714	0.001***
Lower	AMA	0.728953	0.001***
	PMA	0.498718	0.001***
	OMA	0.517526	0.001***
	AO	0.727435	0.001***
	MMH	0.500184	0.001***
	AMH	0.627375	0.001***
K values for individual MA and functional index variables of the extant skull dataset herein. The updated phylogeny used here returned generally lower K values than those reported in Miller et al. 2023 [Quantitative investigation of Mesozoic toothed birds (Pengornithidae) diet reveals earliest evidence of macrocarnivory in birds]. A K value of 1 indicates trait variation distributed as expected u…
