# Supplementary material for: Synthetic analysis of trophic diversity and evolution in Enantiornithes with new insights from Bohaiornithidae
Source: eLife. 2024 Apr 30;12:RP89871. doi: 10.7554/eLife.89871 (PMC11060716; doi:10.7554/eLife.89871)
Supplement: Supplementary file 3. [file elife-89871-supp3.xlsx]

## Sheet: MA HSD
	Folivore	Frugivore	Generalist	GranivoreH	GranivoreS	Invertivore	Nectarivore	Piscivore	Scavenger	Tetra Hunt
Folivore		0.112	0.267	0.034*	0.536	0.058	0.058	0.001***	0.006**	0.548
Frugivore	0.112		0.468	0.228	0.851	0.203	0.099	0.002**	0.151	0.406
Generalist	0.267	0.468		0.007**	0.859	0.254	0.081	0.001***	0.01*	0.786
GranivoreH	0.034*	0.228	0.007**		0.148	0.001***	0.003**	0.001***	0.005**	0.018*
GranivoreS	0.536	0.851	0.859	0.148		0.658	0.164	0.014*	0.154	0.739
Invertivore	0.058	0.203	0.254	0.001***	0.658		0.262	0.001***	0.034*	0.766
Nectarivore	0.058	0.099	0.081	0.003**	0.164	0.262		0.489	0.49	0.392
Piscivore	0.001***	0.002**	0.001***	0.001***	0.014*	0.001***	0.489		0.283	0.039*
Scavenger	0.006**	0.151	0.01*	0.005**	0.154	0.034*	0.49	0.283		0.132
Tetra Hunt	0.548	0.406	0.786	0.018*	0.739	0.766	0.392	0.039*	0.132
Significant differences between extant diet groups, based on phylogenetic HSD of MA and functional indices. The updated phylogeny used here does not change any groups’ significant difference from one another from Miller et al. 2023 [Quantitative investigation of Mesozoic toothed birds (Pengornithidae) diet reveals earliest evidence of macrocarnivory in birds]. One asterisk (*) indicates significa…
