# Supplementary material for: Synthetic analysis of trophic diversity and evolution in Enantiornithes with new insights from Bohaiornithidae
Source: eLife. 2024 Apr 30;12:RP89871. doi: 10.7554/eLife.89871 (PMC11060716; doi:10.7554/eLife.89871)
Supplement: Supplementary file 4. [file elife-89871-supp4.xlsx]

## Sheet: MA FDA
Adjustment	Taxon	Folivore	Frugivore	Generalist	GranivoreH	GranivoreS	Invertivore	Nectarivore	Piscivore	Scavenger	Tetra Hunt
Anterior	Bohaiornis	1	4.51e-07	2.86e-05	1.86e-14	1.72e-05	1.83e-07	1.32e-06	5.17e-09	1.78e-12	4.54e-09
	Longusunguis	0.99	0.000557	0.00875	1.98e-11	0.000403	0.000117	0.000183	1.73e-05	8.58e-09	1.78e-06
	Parabohaiornis	5.53e-05	2.36e-07	0.00192	2.97e-07	3.54e-05	4.06e-07	1.97e-09	1.37e-05	0.998	1.14e-05
	Shenqiornis	0.644	0.00207	0.336	2.57e-08	0.00296	0.00362	0.00181	0.00911	0.000167	2.96e-05
	Sulcavis	0.8	0.00177	0.192	6.72e-09	0.00195	0.00137	0.000564	0.00187	1.01e-05	2.73e-05
	Zhouornis	0.433	0.0893	0.28	9.73e-08	0.0359	0.0903	0.0362	0.0179	0.000149	0.0171
Posterior	Bohaiornis	0.997	3.38e-05	0.0012	4.7e-12	0.00122	4.75e-05	7.74e-05	2e-06	3.22e-09	4.15e-07
	Longusunguis	0.000555	0.191	0.321	2.48e-06	0.00156	0.274	0.0262	0.178	0.00039	0.0078
	Parabohaiornis	6.97e-06	5.93e-07	0.00136	1.56e-07	3.46e-05	1.4e-06	3.02e-09	2.85e-05	0.999	7.54e-06
	Shenqiornis	0.000521	0.0103	0.393	5.36e-06	0.000881	0.0707	0.00617	0.491	0.0274	0.000814
	Sulcavis	0.00152	0.0232	0.621	6.2e-06	0.00161	0.0678	0.00356	0.274	0.00498	0.00203
	Zhouornis	3.09e-05	0.0831	0.064	1.55e-05	0.00176	0.391	0.0194	0.274	0.00834	0.159
Sensitivity analysis of quadrate position affecting bohaiornithid predictions diet by FDA from MA and functional indices of extant bird jaws. Values with green backgrounds are more likely, values with red backgrounds are less likely. Compared to results with most likely reconstructions (Table 4), folivory is more likely when the quadrate is shifted anteriorly and piscivory is more likely when the…
