# Supplementary material for: Synthetic analysis of trophic diversity and evolution in Enantiornithes with new insights from Bohaiornithidae
Source: eLife. 2024 Apr 30;12:RP89871. doi: 10.7554/eLife.89871 (PMC11060716; doi:10.7554/eLife.89871)
Supplement: Supplementary file 5. [file elife-89871-supp5.xlsx]

## Sheet: FEA HSD
	Folivore	Frugivore	Generalist	GranivoreH	GranivoreS	Invertivore	Nectarivore	Piscivore	Scavenger	Tetra Hunt
Folivore		0.405	0.291	0.08	0.088	0.036*	0.097	0.377	0.061	0.212
Frugivore	0.405		0.981	0.531	0.464	0.522	0.363	0.94	0.068	0.676
Generalist	0.291	0.981		0.226	0.419	0.102	0.246	0.918	0.011*	0.684
GranivoreH	0.08	0.531	0.226		0.311	0.228	0.315	0.52	0.035*	0.388
GranivoreS	0.088	0.464	0.419	0.311		0.928	0.781	0.833	0.011*	0.82
Invertivore	0.036*	0.522	0.102	0.228	0.928		0.702	0.661	0.006**	0.359
Nectarivore	0.097	0.363	0.246	0.315	0.781	0.702		0.399	0.021*	0.601
Piscivore	0.377	0.94	0.918	0.52	0.833	0.661	0.399		0.025*	0.661
Scavenger	0.061	0.068	0.011*	0.035*	0.011*	0.006**	0.021*	0.025*		0.019*
Tetra Hunt	0.212	0.676	0.684	0.388	0.82	0.359	0.601	0.661	0.019*
Significant differences between extant diet groups, based on phylogenetic HSD of FEA intervals data. The updated phylogeny used here leads to less significant differences than found in Miller et al. 2023 [Quantitative investigation of Mesozoic toothed birds (Pengornithidae) diet reveals earliest evidence of macrocarnivory in birds]: folivores are no longer significantly different from husking gra…
