# Supplementary material for: Synthetic analysis of trophic diversity and evolution in Enantiornithes with new insights from Bohaiornithidae
Source: eLife. 2024 Apr 30;12:RP89871. doi: 10.7554/eLife.89871 (PMC11060716; doi:10.7554/eLife.89871)
Supplement: Supplementary file 6. [file elife-89871-supp6.xlsx]

## Sheet: pTM K
Variable	K	p-value
DI/DIII ratio	0.781868	0.001***
DII/DIII ratio	0.648905	0.001***
DIV/DIII ratio	0.410958	0.001***
DI angle	0.643955	0.001***
DII angle	0.612921	0.001***
DIII angle	0.391988	0.001***
DIV angle	0.315336	0.010**
K values for individual variables used in pedal TM analyses. The updated phylogeny used here returned generally lower K values than those reported in Miller et al. 2023 [Quantitative investigation of Mesozoic toothed birds (Pengornithidae) diet reveals earliest evidence of macrocarnivory in birds]. A K value of 1 indicates trait variation distributed as expected under a BM model of evolution; val…
