# Supplementary material for: Synthetic analysis of trophic diversity and evolution in Enantiornithes with new insights from Bohaiornithidae
Source: eLife. 2024 Apr 30;12:RP89871. doi: 10.7554/eLife.89871 (PMC11060716; doi:10.7554/eLife.89871)
Supplement: Supplementary file 7. [file elife-89871-supp7.xlsx]

## Sheet: pTM HSD
	Ground	Perch	Large Raptor	Small Raptor	Shrike
Ground		0.006**	0.007**	0.072	0.027*
Perch	0.006**		0.995	0.414	0.433
Large Raptor	0.007**	0.995		0.026*	0.295
Small Raptor	0.072	0.414	0.026*		0.388
Shrike	0.027*	0.433	0.295	0.388
Significant differences between extant pedal ecology groups, based on phylogenetic HSD of pedal TM data. The updates to phylogeny and additional extant data used here do not change any groups’ significant difference from one another from Miller et al. 2023 [Quantitative investigation of Mesozoic toothed birds (Pengornithidae) diet reveals earliest evidence of macrocarnivory in birds]. One asteris…
