# Supplementary material for: Synthetic analysis of trophic diversity and evolution in Enantiornithes with new insights from Bohaiornithidae
Source: eLife. 2024 Apr 30;12:RP89871. doi: 10.7554/eLife.89871 (PMC11060716; doi:10.7554/eLife.89871)
Supplement: Supplementary file 8. [file elife-89871-supp8.xlsx]

## Sheet: sTM K
Variable	K	p-value
Skull Length	0.892523	0.001***
Rostrum Length	0.905998	0.001***
LOG10 Rostrum Length / LOG10 Skull Length	0.642719	0.001***
Relative Skull Length	1.31614	0.001***
K values for individual variables used in skull TM analyses. Relative Skull Length is defined mathematically in the Methods of the main text. A K value of 1 indicates trait variation distributed as expected under a BM model of evolution; values below 1 indicate closely-related species are less similar than expected by BM, values above 1 that they are more similar. Three asterisks (***) indicates …
